# Supplementary material for: The first lanthanide-templated molecular wheel containing six copper ions †
Source: Royal Society of Chemistry journal article supplement (doi:10.1039/b003670f), 2000-01-01
Supplement: b003670f.doc [file b003670f.doc]

**Fig. S1.** Part of structure of cluster core of **1.** Selected bond lengths (Å): Pr(1)-O(8) = 2.534(10), Pr(1)-O(2) = 2.625(11), Pr(1)-O(7) = 2.724(8), Pr(1)-O(1) = 2.880(9), Pr(2)-O(14) = 2.12(9), Cu(1)-O(1) = 1.905(10), Cu(1)-O(5) = 1.932(12), Cu(1)-O(10a) = 1.960(9), Cu(1)-N(1) = 2.088(11), Cu(1)-O(3) = 2.258(9), Cu(2)-O(4a) = 1.919(10), Cu(2)-O(11) = 1.942(9), Cu(2)-N(2) = 2.015(13), Cu(2)-O(7) = 2.049(7), Cu(2)-O(9) = 2.209(9). Symmetry code: a y, z, x.

**Fig. S2.** Temperature dependence of MT and M-1 for **1** in an applied field of 5KOe. Solid line is the fitting result based on the Curie-Weiss law.
